# Supplementary material for: Analysis of genetic variants in myeloproliferative neoplasms using a 22-gene next-generation sequencing panel
Source: PubMed Central journal article supplement (PMC8760696; doi:10.1186/s12920-021-01145-0), 2022-01-15
Supplement: 12920_2021_1145_MOESM1_ESM.pdf [file 12920_2021_1145_MOESM1_ESM.pdf]

**Additional file 1: Table S1.** Targeted exons of 22 MPN-associated genes in the custom NGS panel.

| <b>Target Region</b>                                                                                    | <b>hg19 Genomic Location</b> |
|---------------------------------------------------------------------------------------------------------|------------------------------|
| ABL1_Exon 4 (ENST00000372348);<br>ABL1_Exon 4 (ENST00000318560)                                         | chr9:133738150-133738422     |
| ABL1_Exon 5 (ENST00000372348);<br>ABL1_Exon 5 (ENST00000318560)                                         | chr9:133747516-133747600     |
| ABL1_Exon 6 (ENST00000372348);<br>ABL1_Exon 6 (ENST00000318560)                                         | chr9:133748247-133748424     |
| ABL1_Exon 7 (ENST00000372348);<br>ABL1_Exon 7 (ENST00000318560)                                         | chr9:133750255-133750439     |
| ABL1_Exon 8 (ENST00000372348);<br>ABL1_Exon 8 (ENST00000318560)                                         | chr9:133753802-133753954     |
| ABL1_Exon 9 (ENST00000372348);<br>ABL1_Exon 9 (ENST00000318560)                                         | chr9:133755455-133755544     |
| ASXL1_Exon 10 (ENST00000375687)                                                                         | chr20:31019386-31019482      |
| ASXL1_Exon 11(ENST00000375687)                                                                          | chr20:31020683-31020788      |
| ASXL1_Exon 12 (ENST00000375687)                                                                         | chr20:31021087-31021720      |
| ASXL1_Exon 13 (ENST00000375687)                                                                         | chr20:31022235-31025141      |
| CALR_Exon 9 (ENST00000316448 )                                                                          | chr19:13054527-13054727      |
| CBL_Exon 8 (ENST00000264033)                                                                            | chr11:119148876-119149007    |
| CBL_Exon 9 (ENST00000264033)                                                                            | chr11:119149220-119149423    |
| CEBPA_Exon 1 (ENST00000498907)                                                                          | chr19:33792244-33793320      |
| CSF3R_Exon 10 (ENST00000373103);<br>CSF3R_Exon 10 (ENST00000373104);<br>CSF3R_Exon 10 (ENST00000373106) | chr1:36937034-36937247       |
| CSF3R_Exon 14 (ENST00000373103);<br>CSF3R_Exon 14 (ENST00000373104);<br>CSF3R_Exon 14 (ENST00000373106) | chr1:36933423-36933563       |
| CSF3R_Exon 15 (ENST00000373103);<br>CSF3R_Exon 15 (ENST00000373104);<br>CSF3R_Exon 15 (ENST00000373106) | chr1:36933159-36933252       |
| CSF3R_Exon 16 (ENST00000373103);<br>CSF3R_Exon 16 (ENST00000373104);<br>CSF3R_Exon 16 (ENST00000373106) | chr1:36932831-36932912       |
| CSF3R_Exon 17 (ENST00000373103);<br>CSF3R_Exon 17 (ENST00000373106)                                     | chr1:36931958-36932509       |
| CSF3R_Exon 18 (ENST00000373104)                                                                         | chr1:36931697-36931801       |
| DNMT3A_Exon 1 (ENST00000380746)                                                                         | chr2:25475063-25475066       |
| DNMT3A_Exon 2 (ENST00000380746)                                                                         | chr2:25472526-25472593       |
| DNMT3A_Exon 2 (ENST00000321117);<br>DNMT3A_Exon 2 (ENST00000264709);<br>DNMT3A_Exon 2 (ENST00000380746) | chr2:25536782-25536853       |
| DNMT3A_Exon 3 (ENST00000321117);<br>DNMT3A_Exon 3 (ENST00000264709);<br>DNMT3A_Exon 3 (ENST00000380746) | chr2:25523008-25523112       |

Additional file 1: Table S1. Cont.

|                                                                                                            |                         |
|------------------------------------------------------------------------------------------------------------|-------------------------|
| DNMT3A_Exon 4 (ENST00000321117);<br>DNMT3A_Exon 4 (ENST00000264709);<br>DNMT3A_Exon 4 (ENST00000380746)    | chr2:25505257-25505580  |
| DNMT3A_Exon 5 (ENST00000321117);<br>DNMT3A_Exon 5 (ENST00000264709)                                        | chr2:25498369-25498412  |
| DNMT3A_Exon 6 (ENST00000321117);<br>DNMT3A_Exon 6 (ENST00000264709)                                        | chr2:25497810-25497956  |
| DNMT3A_Exon 7 (ENST00000321117);<br>DNMT3A_Exon 7 (ENST00000264709);<br>DNMT3A_Exon 3 (ENST00000380746)    | chr2:25470906-25471121  |
| DNMT3A_Exon 8 (ENST00000321117);<br>DNMT3A_Exon 8 (ENST00000264709);<br>DNMT3A_Exon 4 (ENST00000380746)    | cchr2:25470460-25470618 |
| DNMT3A_Exon 9 (ENST00000321117);<br>DNMT3A_Exon 9 (ENST00000264709);<br>DNMT3A_Exon 5 (ENST00000380746)    | chr2:25469920-25470027  |
| DNMT3A_Exon 10 (ENST00000321117);<br>DNMT3A_Exon 10 (ENST00000264709);<br>DNMT3A_Exon 6 (ENST00000380746)  | chr2:25469489-25469645  |
| DNMT3A_Exon 11 (ENST00000321117);<br>DNMT3A_Exon 11 (ENST00000264709);<br>DNMT3A_Exon 7 (ENST00000380746)  | chr2:25469029-25469178  |
| DNMT3A_Exon 12 (ENST00000321117);<br>DNMT3A_Exon 12 (ENST00000264709);<br>DNMT3A_Exon 8 (ENST00000380746)  | chr2:25468889-25468933  |
| DNMT3A_Exon 13 (ENST00000321117);<br>DNMT3A_Exon 13 (ENST00000264709);<br>DNMT3A_Exon 9 (ENST00000380746)  | chr2:25468122-25468201  |
| DNMT3A_Exon 14 (ENST00000321117);<br>DNMT3A_Exon 14 (ENST00000264709);<br>DNMT3A_Exon 10 (ENST00000380746) | chr2:25467409-25467521  |
| DNMT3A_Exon 15 (ENST00000321117);<br>DNMT3A_Exon 15 (ENST00000264709);<br>DNMT3A_Exon 11 (ENST00000380746) | chr2:25467024-25467207  |
| DNMT3A_Exon 16 (ENST00000321117);<br>DNMT3A_Exon 16 (ENST00000264709);<br>DNMT3A_Exon 12 (ENST00000380746) | chr2:25466767-25466851  |
| DNMT3A_Exon 17 (ENST00000321117);<br>DNMT3A_Exon 17 (ENST00000264709);<br>DNMT3A_Exon 13 (ENST00000380746) | chr2:25464431-25464576  |
| DNMT3A_Exon 18 (ENST00000321117);<br>DNMT3A_Exon 18 (ENST00000264709);<br>DNMT3A_Exon 14 (ENST00000380746) | chr2:25463509-25463599  |
| DNMT3A_Exon 19 (ENST00000321117);<br>DNMT3A_Exon 19 (ENST00000264709);<br>DNMT3A_Exon 15 (ENST00000380746) | chr2:25463171-25463319  |

**Additional file 1: Table S1. Cont.**

|                                                                                                            |                          |
|------------------------------------------------------------------------------------------------------------|--------------------------|
| DNMT3A_Exon 20 (ENST00000321117);<br>DNMT3A_Exon 20 (ENST00000264709);<br>DNMT3A_Exon 16 (ENST00000380746) | chr2:25461999-25462084   |
| DNMT3A_Exon 21 (ENST00000321117);<br>DNMT3A_Exon 21 (ENST00000264709);<br>DNMT3A_Exon 17 (ENST00000380746) | chr2:25459805-25459874   |
| DNMT3A_Exon 22 (ENST00000321117);<br>DNMT3A_Exon 22 (ENST00000264709);<br>DNMT3A_Exon 18 (ENST00000380746) | chr2:25458576-25458694   |
| DNMT3A_Exon 23 (ENST00000321117);<br>DNMT3A_Exon 23 (ENST00000264709);<br>DNMT3A_Exon 19 (ENST00000380746) | chr2:25457148-25457289   |
| EZH2_Exon 2 (ENST00000320356 );<br>EZH2_Exon 2 (ENST00000350995);<br>EZH2_Exon 2 (ENST00000476773)         | chr7:148544274-148544390 |
| EZH2_Exon 3 (ENST00000320356 );<br>EZH2_Exon 3 (ENST00000350995);<br>EZH2_Exon 3 (ENST00000476773)         | chr7:148543562-148543690 |
| EZH2_Exon 4 (ENST00000320356 );<br>EZH2_Exon 4 (ENST00000476773)                                           | chr7:148529726-148529842 |
| EZH2_Exon 5 (ENST00000320356 );<br>EZH2_Exon 4 (ENST00000350995);<br>EZH2_Exon 5 (ENST00000476773)         | chr7:148526820-148526940 |
| EZH2_Exon 6 (ENST00000320356 );<br>EZH2_Exon 5 (ENST00000350995);<br>EZH2_Exon 6 (ENST00000476773)         | chr7:148525832-148525972 |
| EZH2_Exon 7 (ENST00000320356 );<br>EZH2_Exon 6 (ENST00000350995);<br>EZH2_Exon 7 (ENST00000476773 )        | chr7:148524256-148524358 |
| EZH2_Exon 8 (ENST00000320356 );<br>EZH2_Exon 7 (ENST00000350995);<br>EZH2_Exon 8 (ENST00000476773)         | chr7:148523546-148523724 |
| EZH2_Exon 9 (ENST00000320356 );<br>EZH2_Exon 8 (ENST00000350995);<br>EZH2_Exon 9 (ENST00000476773)         | chr7:148516688-148516779 |
| EZH2_Exon 10 (ENST00000320356);<br>EZH2_Exon 9 (ENST00000350995);<br>EZH2_Exon 10 (ENST00000476773)        | chr7:148514969-148515209 |
| EZH2_Exon 11 (ENST00000320356);<br>EZH2_Exon 10 (ENST00000350995);<br>EZH2_Exon 11 (ENST00000476773)       | chr7:148514314-148514483 |
| EZH2_Exon 12 (ENST00000320356);<br>EZH2_Exon 11 (ENST00000350995);<br>EZH2_Exon 12 (ENST00000476773)       | chr7:148513776-148513870 |
| EZH2_Exon 13 (ENST00000320356);<br>EZH2_Exon 12 (ENST00000350995);<br>EZH2_Exon 13 (ENST00000476773)       | chr7:148512598-148512638 |

**Additional file 1: Table S1. Cont.**

|                                                                                                          |                          |
|----------------------------------------------------------------------------------------------------------|--------------------------|
| EZH2_ Exon 14 (ENST00000320356 );<br>EZH2_ Exon 13 (ENST00000350995)                                     | chr7:148512006-148512131 |
| EZH2_ Exon 15 (ENST00000320356 );<br>EZH2_ Exon 14 (ENST00000350995);<br>EZH2_ Exon 14 (ENST00000476773) | chr7:148511051-148511229 |
| EZH2_ Exon 16 (ENST00000320356 );<br>EZH2_ Exon 15 (ENST00000350995);<br>EZH2_ Exon 15 (ENST00000476773) | chr7:148508717-148508812 |
| EZH2_ Exon 17 (ENST00000320356 );<br>EZH2_ Exon 16 (ENST00000350995);<br>EZH2_ Exon 16 (ENST00000476773) | chr7:148507425-148507506 |
| EZH2_ Exon 18 (ENST00000320356 );<br>EZH2_ Exon 17 (ENST00000350995);<br>EZH2_ Exon 17 (ENST00000476773) | chr7:148506402-148506482 |
| EZH2_ Exon 19 (ENST00000320356 );<br>EZH2_ Exon 18 (ENST00000350995);<br>EZH2_ Exon 18 (ENST00000476773) | chr7:148506163-148506247 |
| EZH2_ Exon 20 (ENST00000320356 );<br>EZH2_ Exon 19 (ENST00000350995);<br>EZH2_ Exon 19 (ENST00000476773) | chr7:148504738-148504798 |
| FLT3_ Exon 13 (ENST00000241453)                                                                          | chr13:28608438-28608544  |
| FLT3_ Exon 14 (ENST00000241453)                                                                          | chr13:28608219-28608351  |
| FLT3_ Exon 15 (ENST00000241453)                                                                          | chr13:28608024-28608128  |
| FLT3_ Exon 20 (ENST00000241453)                                                                          | chr13:28592604-28592726  |
| IDH1_ Exon 4 (ENST00000345146)                                                                           | chr2:209113093-209113384 |
| IDH2_ Exon 4 (ENST00000330062)                                                                           | chr15:90631819-90631979  |
| JAK2_ Exon 12 (ENST00000381652)                                                                          | chr9:5069925-5070052     |
| JAK2_ Exon 13 (ENST00000381652)                                                                          | chr9:5072492-5072626     |
| JAK2_ Exon 14 (ENST00000381652)                                                                          | chr9:5073698-5073785     |
| JAK2_ Exon 15 (ENST00000381652)                                                                          | chr9:5077453-5077580     |
| JAK2_ Exon 16 (ENST00000381652)                                                                          | chr9:5078306-5078444     |
| KIT_ Exon 2 (ENST00000288135)                                                                            | chr4:55561678-55561947   |
| KIT_ Exon 8 (ENST00000288135)                                                                            | chr4:55589750-55589864   |
| KIT_ Exon 9 (ENST00000288135)                                                                            | chr4:55592023-55592216   |
| KIT_ Exon 10 (ENST00000288135)                                                                           | chr4:55593384-55593490   |
| KIT_ Exon 11 (ENST00000288135)                                                                           | chr4:55593582-55593708   |
| KIT_ Exon 13 (ENST00000288135)                                                                           | chr4:55594177-55594287   |
| KIT_ Exon 17 (ENST00000288135)                                                                           | chr4:55599236-55599358   |
| KIT_ Exon 18 (ENST00000288135)                                                                           | chr4:55602664-55602775   |
| MPL_ Exon 10 (ENST00000372470)                                                                           | chr1:43814934-43815030   |
| NPM1_ Exon 11 (ENST00000296930 );<br>NPM1_ Exon 10 (ENST00000351986)                                     | chr5:170837531-170837569 |
| PDGFRA_ Exon 12 (ENST00000257290)                                                                        | chr4:55141008-55141140   |
| PDGFRA_ Exon 14 (ENST00000257290)                                                                        | chr4:55144063-55144173   |

Additional file 1: Table S1. Cont.

|                                                                                                           |                          |
|-----------------------------------------------------------------------------------------------------------|--------------------------|
| PDGFRA_ Exon 18 (ENST00000257290)                                                                         | chr4:55152008-55152130   |
| RUNX1_ Exon 1 (ENST00000344691 );<br>RUNX1_ Exon 1 (ENST00000358356 )                                     | chr21:36259140-36259409  |
| RUNX1_ Exon 2 (ENST00000437180)                                                                           | chr21:36421139-36421196  |
| RUNX1_ Exon 3 (ENST00000437180)                                                                           | chr21:36265222-36265260  |
| RUNX1_ Exon 5 (ENST00000437180);<br>RUN X1_ Exon 2 (ENST00000344691);<br>RUNX1_ Exon 2 (ENST00000358356)  | chr21:36252854-36253010  |
| RUNX1_ Exon 5 (ENST00000358356)                                                                           | chr21:36193965-36193993  |
| RUNX1_ Exon 6 (ENST00000437180);<br>RUNX1_ Exon 3 (ENST00000344691);<br>RUNX1_ Exon 3 (ENST00000358356)   | chr21:36231771-36231875  |
| RUNX1_ Exon 7 (ENST00000437180 );<br>RUNX1_ Exon 4 (ENST00000344691);<br>RUNX1_ Exon 4 (ENST00000358356 ) | chr21:36206707-36206898  |
| RUNX1_ Exon 8 (ENST00000437180 );<br>RUNX1_ Exon 5 (ENST00000344691)                                      | chr21:36171598-36171759  |
| RUNX1_ Exon 9 (ENST00000437180 );<br>RUNX1_ Exon 6 (ENST00000344691)                                      | chr21:36164432-36164907  |
| SF3B1_ Exon 13 (ENST00000335508 )                                                                         | chr2:198267673-198267759 |
| SF3B1_ Exon 14 ENST00000335508)                                                                           | chr2:198267280-198267550 |
| SF3B1_ Exon 15 ENST00000335508)                                                                           | chr2:198266709-198266854 |
| SF3B1_ Exon 16 ENST00000335508)                                                                           | chr2:198266466-198266612 |
| SRSF2_ Exon 1 (ENST00000392485)                                                                           | chr17:74732881-74733242  |
| TET2_ Exon 3 (ENST00000380013 );<br>TET2_ Exon 3 (ENST00000305737)                                        | chr4:106155100-106158597 |
| TET2_ Exon 4 (ENST00000380013)                                                                            | chr4:106162496-106162586 |
| TET2_ Exon 5 (ENST00000380013)                                                                            | chr4:106163991-106164084 |
| TET2_ Exon 6 (ENST00000380013)                                                                            | chr4:106164727-106164935 |
| TET2_ Exon 7 (ENST00000380013)                                                                            | chr4:106180776-106180926 |
| TET2_ Exon 8 (ENST00000380013)                                                                            | chr4:106182916-106183005 |
| TET2_ Exon 9 (ENST00000380013)                                                                            | chr4:106190767-106190904 |
| TET2_ Exon 10 (ENST00000380013)                                                                           | chr4:106193721-106194075 |
| TET2_ Exon 11 (ENST00000380013)                                                                           | chr4:106196205-106197676 |
| U2AF1_ Exon 2 (ENST00000380276)                                                                           | chr21:44524425-44524512  |
| U2AF1_ Exon 6 (ENST00000380276)                                                                           | chr21:44514765-44514898  |
| TP53_ Exon 2 (ENST00000269305 );<br>TP53_ Exon 1 (ENST00000617185);<br>TP53_ Exon 2 (ENST0000045526)      | chr17:7579839-7579912    |
| TP53_ Exon 3 (ENST00000269305 );<br>TP53_ Exon 2 (ENST00000617185);<br>TP53_ Exon 3 (ENST0000045526)      | chr17:7579700-7579721    |
| TP53_ Exon 4 (ENST00000269305 );<br>TP53_ Exon 3 (ENST00000617185);<br>TP53_ Exon 4 (ENST0000045526)      | chr17:7579312-7579590    |

**Additional file 1: Table S1. Cont.**

|                                                                                                                                                                                                                                                                              |                       |
|------------------------------------------------------------------------------------------------------------------------------------------------------------------------------------------------------------------------------------------------------------------------------|-----------------------|
| TP53_Exon 5 (ENST00000269305 );<br>TP53_Exon 5 (ENST00000622645);<br>TP53_Exon 4 (ENST00000617185);<br>TP53_Exon 4 (ENST00000610292);<br>TP53_Exon 5 (ENST00000455263)                                                                                                       | chr17:7578371-7578554 |
| TP53_Exon 6 (ENST00000269305 );<br>TP53_Exon 6 (ENST00000622645);<br>TP53_Exon 5 (ENST00000617185);<br>TP53_Exon 5 (ENST00000610292);<br>TP53_Exon 6 (ENST00000455263);<br>TP53_Exon 2 (ENST00000510385);<br>TP53_Exon 2 (ENST00000610623);<br>TP53_Exon 2 (ENST00000619186) | chr17:7578177-7578289 |
| TP53_Exon 7 (ENST00000269305 );<br>TP53_Exon 7 (ENST00000622645);<br>TP53_Exon 6 (ENST00000617185);<br>TP53_Exon 6 (ENST00000610292);<br>TP53_Exon 7 (ENST00000455263);<br>TP53_Exon 3 (ENST00000510385);<br>TP53_Exon 3 (ENST00000610623);<br>TP53_Exon 3 (ENST00000619186) | chr17:7577499-7577608 |
| TP53_Exon 8 (ENST00000269305 );<br>TP53_Exon 8 (ENST00000622645);<br>TP53_Exon 7 (ENST00000617185);<br>TP53_Exon 7 (ENST00000610292);<br>TP53_Exon 8 (ENST00000455263);<br>TP53_Exon 4 (ENST00000510385);<br>TP53_Exon 4 (ENST00000610623);<br>TP53_Exon 4 (ENST00000619186) | chr17:7577019-7577155 |
| TP53_Exon 9 (ENST00000269305 );<br>TP53_Exon 9 (ENST00000622645);<br>TP53_Exon 8 (ENST00000617185);<br>TP53_Exon 8 (ENST00000610292);<br>TP53_Exon 9 (ENST00000455263);<br>TP53_Exon 5 (ENST00000510385);<br>TP53_Exon 5 (ENST00000610623);<br>TP53_Exon 5 (ENST00000619186) | chr17:7576853-7576926 |
| TP53_Exon 10 (ENST00000622645);<br>TP53_Exon 9 (ENST00000617185);<br>TP53_Exon 6 (ENST00000510385)                                                                                                                                                                           | chr17:7576625-7576657 |
| TP53_Exon 10 (ENST00000455263);<br>TP53_Exon 6 (ENST00000610623)                                                                                                                                                                                                             | chr17:7576537-7576584 |
| TP53_Exon 10 (ENST00000269305 );<br>TP53_Exon 9 (ENST00000610292);<br>TP53_Exon 6 (NM_001126115)                                                                                                                                                                             | chr17:7573927-7574033 |
| TP53_Exon 11 (ENST00000269305 );<br>TP53_Exon 10 (ENST00000610292);<br>TP53_Exon 7 (NM_001126115)                                                                                                                                                                            | chr17:7572927-7573008 |
