# Supplementary material for: Analysis of genetic variants in myeloproliferative neoplasms using a 22-gene next-generation sequencing panel
Source: PubMed Central journal article supplement (PMC8760696; doi:10.1186/s12920-021-01145-0), 2022-01-15
Supplement: 12920_2021_1145_MOESM2_ESM.pdf [file 12920_2021_1145_MOESM2_ESM.pdf]

**Additional file 2: Table S2.** Amplicon regions.

| <b>No.</b> | <b>Amplicon</b> | <b>Chromosome</b> | <b>Start Position</b> | <b>End Position</b> |
|------------|-----------------|-------------------|-----------------------|---------------------|
| 1          | AMPL98763       | chr9              | 5069847               | 5070002             |
| 2          | AMPL98764       | chr9              | 5069942               | 5070209             |
| 3          | AMPL200312      | chr9              | 5072428               | 5072691             |
| 4          | AMPL90247       | chr9              | 5073605               | 5073878             |
| 5          | AMPL90231       | chr9              | 5077317               | 5077554             |
| 6          | AMPL90232       | chr9              | 5077465               | 5077699             |
| 7          | AMPL90230       | chr9              | 5078234               | 5078508             |
| 8          | AMPL1554        | chr17             | 7572828               | 7573106             |
| 9          | AMPL1120        | chr17             | 7573853               | 7574119             |
| 10         | AMPL1079631     | chr17             | 7576470               | 7576652             |
| 11         | AMPL89085       | chr17             | 7576534               | 7576785             |
| 12         | AMPL89078       | chr17             | 7576758               | 7577034             |
| 13         | AMPL89076       | chr17             | 7576947               | 7577221             |
| 14         | AMPL1108        | chr17             | 7577373               | 7577640             |
| 15         | AMPL89077       | chr17             | 7578062               | 7578321             |
| 16         | AMPL1155        | chr17             | 7578184               | 7578446             |
| 17         | AMPL1156        | chr17             | 7578360               | 7578579             |
| 18         | AMPL1582        | chr17             | 7579263               | 7579513             |
| 19         | AMPL89075       | chr17             | 7579379               | 7579615             |
| 20         | AMPL89084       | chr17             | 7579585               | 7579843             |
| 21         | AMPL89079       | chr17             | 7579713               | 7579991             |
| 22         | AMPL200421      | chr19             | 13054318              | 13054595            |
| 23         | AMPL200422      | chr19             | 13054523              | 13054702            |
| 24         | AMPL117175      | chr19             | 13054634              | 13054811            |
| 25         | AMPL89344       | chr2              | 25457023              | 25457296            |
| 26         | AMPL89345       | chr2              | 25457241              | 25457463            |
| 27         | AMPL89341       | chr2              | 25458476              | 25458754            |
| 28         | AMPL89342       | chr2              | 25459665              | 25459930            |
| 29         | AMPL89335       | chr2              | 25461854              | 25462128            |
| 30         | AMPL89351       | chr2              | 25463078              | 25463354            |
| 31         | AMPL200683      | chr2              | 25463420              | 25463689            |
| 32         | AMPL89336       | chr2              | 25464282              | 25464554            |
| 33         | AMPL89337       | chr2              | 25464411              | 25464625            |
| 34         | AMPL89328       | chr2              | 25466602              | 25466882            |
| 35         | AMPL89329       | chr2              | 25466820              | 25467067            |
| 36         | AMPL89330       | chr2              | 25467017              | 25467290            |
| 37         | AMPL89349       | chr2              | 25467257              | 25467528            |
| 38         | AMPL89350       | chr2              | 25467455              | 25467732            |
| 39         | AMPL89347       | chr2              | 25467912              | 25468183            |
| 40         | AMPL89348       | chr2              | 25468123              | 25468398            |
| 41         | AMPL89331       | chr2              | 25468791              | 25469066            |
| 42         | AMPL89332       | chr2              | 25469006              | 25469224            |
| 43         | AMPL89323       | chr2              | 25469290              | 25469565            |
| 44         | AMPL89324       | chr2              | 25469472              | 25469740            |
| 45         | AMPL89338       | chr2              | 25469854              | 25470085            |
| 46         | AMPL89346       | chr2              | 25470399              | 25470668            |
| 47         | AMPL89325       | chr2              | 25470872              | 25471124            |
| 48         | AMPL89326       | chr2              | 25471065              | 25471217            |

Additional file 2: Table S2. *Cont.*

|    |            |       |          |          |
|----|------------|-------|----------|----------|
| 49 | AMPL89334  | chr2  | 25472420 | 25472700 |
| 50 | AMPL89327  | chr2  | 25474886 | 25475152 |
| 51 | AMPL89318  | chr2  | 25497733 | 25497996 |
| 52 | AMPL89340  | chr2  | 25498240 | 25498480 |
| 53 | AMPL89320  | chr2  | 25505121 | 25505378 |
| 54 | AMPL89321  | chr2  | 25505241 | 25505511 |
| 55 | AMPL89322  | chr2  | 25505350 | 25505605 |
| 56 | AMPL89339  | chr2  | 25522980 | 25523258 |
| 57 | AMPL89343  | chr2  | 25536682 | 25536954 |
| 58 | AMPL89906  | chr13 | 28592520 | 28592795 |
| 59 | AMPL89919  | chr13 | 28607935 | 28608208 |
| 60 | AMPL89900  | chr13 | 28608133 | 28608408 |
| 61 | AMPL89896  | chr13 | 28608365 | 28608627 |
| 62 | AMPL90402  | chr20 | 31019319 | 31019552 |
| 63 | AMPL90410  | chr20 | 31020612 | 31020881 |
| 64 | AMPL90406  | chr20 | 31021053 | 31021328 |
| 65 | AMPL90407  | chr20 | 31021257 | 31021526 |
| 66 | AMPL90408  | chr20 | 31021466 | 31021619 |
| 67 | AMPL90409  | chr20 | 31021559 | 31021746 |
| 68 | AMPL90412  | chr20 | 31022147 | 31022420 |
| 69 | AMPL90413  | chr20 | 31022344 | 31022616 |
| 70 | AMPL90414  | chr20 | 31022561 | 31022729 |
| 71 | AMPL90415  | chr20 | 31022669 | 31022875 |
| 72 | AMPL90416  | chr20 | 31022815 | 31022995 |
| 73 | AMPL90417  | chr20 | 31022935 | 31023187 |
| 74 | AMPL90418  | chr20 | 31023127 | 31023404 |
| 75 | AMPL90419  | chr20 | 31023344 | 31023610 |
| 76 | AMPL90420  | chr20 | 31023550 | 31023788 |
| 77 | AMPL90421  | chr20 | 31023727 | 31023979 |
| 78 | AMPL90422  | chr20 | 31023918 | 31024184 |
| 79 | AMPL90423  | chr20 | 31024124 | 31024350 |
| 80 | AMPL90424  | chr20 | 31024290 | 31024556 |
| 81 | AMPL90425  | chr20 | 31024496 | 31024667 |
| 82 | AMPL90426  | chr20 | 31024607 | 31024872 |
| 83 | AMPL90427  | chr20 | 31024812 | 31024992 |
| 84 | AMPL90428  | chr20 | 31024932 | 31025133 |
| 85 | AMPL90429  | chr20 | 31025073 | 31025256 |
| 86 | AMPL32886  | chr19 | 33792123 | 33792403 |
| 87 | AMPL32888  | chr19 | 33792342 | 33792490 |
| 88 | AMPL88426  | chr19 | 33792429 | 33792714 |
| 89 | AMPL88427  | chr19 | 33792654 | 33792858 |
| 90 | AMPL88428  | chr19 | 33792798 | 33793017 |
| 91 | AMPL88429  | chr19 | 33792823 | 33793091 |
| 92 | AMPL32897  | chr19 | 33792987 | 33793139 |
| 93 | AMPL32898  | chr19 | 33793079 | 33793347 |
| 94 | AMPL317545 | chr21 | 36164263 | 36164539 |
| 95 | AMPL89657  | chr21 | 36164427 | 36164674 |
| 96 | AMPL89658  | chr21 | 36164612 | 36164785 |
| 97 | AMPL89659  | chr21 | 36164644 | 36164907 |

Additional file 2: Table S2. Cont.

|     |            |       |           |           |
|-----|------------|-------|-----------|-----------|
| 98  | AMPL89660  | chr21 | 36164761  | 36164944  |
| 99  | AMPL89671  | chr21 | 36171566  | 36171835  |
| 100 | AMPL89664  | chr21 | 36193836  | 36194110  |
| 101 | AMPL89665  | chr21 | 36206681  | 36206910  |
| 102 | AMPL89666  | chr21 | 36206860  | 36206985  |
| 103 | AMPL89670  | chr21 | 36231691  | 36231961  |
| 104 | AMPL89674  | chr21 | 36252796  | 36253068  |
| 105 | AMPL317555 | chr21 | 36258905  | 36259189  |
| 106 | AMPL89662  | chr21 | 36259126  | 36259402  |
| 107 | AMPL89663  | chr21 | 36259317  | 36259451  |
| 108 | AMPL89668  | chr21 | 36264989  | 36265262  |
| 109 | AMPL89669  | chr21 | 36265211  | 36265363  |
| 110 | AMPL89667  | chr21 | 36421010  | 36421288  |
| 111 | AMPL89573  | chr1  | 36931628  | 36931886  |
| 112 | AMPL89551  | chr1  | 36931865  | 36932118  |
| 113 | AMPL89552  | chr1  | 36932013  | 36932236  |
| 114 | AMPL89553  | chr1  | 36932149  | 36932377  |
| 115 | AMPL89554  | chr1  | 36932316  | 36932540  |
| 116 | AMPL89564  | chr1  | 36932754  | 36933031  |
| 117 | AMPL89567  | chr1  | 36933053  | 36933305  |
| 118 | AMPL89559  | chr1  | 36933339  | 36933610  |
| 119 | AMPL89571  | chr1  | 36936943  | 36937102  |
| 120 | AMPL89572  | chr1  | 36937030  | 36937303  |
| 121 | AMPL117202 | chr1  | 43814902  | 43815103  |
| 122 | AMPL89822  | chr21 | 44514676  | 44514947  |
| 123 | AMPL89820  | chr21 | 44524311  | 44524583  |
| 124 | AMPL115670 | chr4  | 55140953  | 55141196  |
| 125 | AMPL200888 | chr4  | 55144003  | 55144234  |
| 126 | AMPL115657 | chr4  | 55151945  | 55152194  |
| 127 | AMPL90096  | chr4  | 55561523  | 55561789  |
| 128 | AMPL90097  | chr4  | 55561729  | 55561972  |
| 129 | AMPL90098  | chr4  | 55589666  | 55589931  |
| 130 | AMPL90095  | chr4  | 55591996  | 55592269  |
| 131 | AMPL90107  | chr4  | 55593313  | 55593571  |
| 132 | AMPL201076 | chr4  | 55593508  | 55593783  |
| 133 | AMPL90106  | chr4  | 55594111  | 55594375  |
| 134 | AMPL253513 | chr4  | 55599207  | 55599388  |
| 135 | AMPL90108  | chr4  | 55602581  | 55602852  |
| 136 | AMPL89847  | chr17 | 74732798  | 74733072  |
| 137 | AMPL89848  | chr17 | 74733010  | 74733262  |
| 138 | AMPL89849  | chr17 | 74733193  | 74733461  |
| 139 | AMPL1123   | chr15 | 90631710  | 90631979  |
| 140 | AMPL1124   | chr15 | 90631919  | 90632092  |
| 141 | AMPL89402  | chr4  | 106154875 | 106155149 |
| 142 | AMPL89403  | chr4  | 106155089 | 106155280 |
| 143 | AMPL89404  | chr4  | 106155220 | 106155475 |
| 144 | AMPL89405  | chr4  | 106155415 | 106155683 |
| 145 | AMPL89406  | chr4  | 106155623 | 106155878 |
| 146 | AMPL89407  | chr4  | 106155818 | 106156067 |

Additional file 2: Table S2. *Cont.*

|     |            |       |           |           |
|-----|------------|-------|-----------|-----------|
| 147 | AMPL89408  | chr4  | 106156007 | 106156279 |
| 148 | AMPL89409  | chr4  | 106156219 | 106156470 |
| 149 | AMPL89410  | chr4  | 106156410 | 106156676 |
| 150 | AMPL89411  | chr4  | 106156616 | 106156887 |
| 151 | AMPL89412  | chr4  | 106156827 | 106157102 |
| 152 | AMPL89413  | chr4  | 106157042 | 106157315 |
| 153 | AMPL89414  | chr4  | 106157254 | 106157528 |
| 154 | AMPL89415  | chr4  | 106157468 | 106157732 |
| 155 | AMPL89416  | chr4  | 106157672 | 106157951 |
| 156 | AMPL89417  | chr4  | 106157889 | 106158132 |
| 157 | AMPL89418  | chr4  | 106158072 | 106158283 |
| 158 | AMPL89419  | chr4  | 106158223 | 106158438 |
| 159 | AMPL89420  | chr4  | 106158378 | 106158622 |
| 160 | AMPL89421  | chr4  | 106162393 | 106162664 |
| 161 | AMPL89401  | chr4  | 106163889 | 106164153 |
| 162 | AMPL89399  | chr4  | 106164648 | 106164878 |
| 163 | AMPL89400  | chr4  | 106164816 | 106165005 |
| 164 | AMPL1398   | chr4  | 106180619 | 106180878 |
| 165 | AMPL1399   | chr4  | 106180818 | 106181052 |
| 166 | AMPL1233   | chr4  | 106182796 | 106183047 |
| 167 | AMPL1414   | chr4  | 106190693 | 106190957 |
| 168 | AMPL1457   | chr4  | 106193664 | 106193919 |
| 169 | AMPL1458   | chr4  | 106193859 | 106194113 |
| 170 | AMPL1558   | chr4  | 106196160 | 106196409 |
| 171 | AMPL1559   | chr4  | 106196349 | 106196621 |
| 172 | AMPL1560   | chr4  | 106196560 | 106196821 |
| 173 | AMPL1561   | chr4  | 106196761 | 106197034 |
| 174 | AMPL1562   | chr4  | 106196974 | 106197249 |
| 175 | AMPL1563   | chr4  | 106197189 | 106197407 |
| 176 | AMPL1564   | chr4  | 106197347 | 106197501 |
| 177 | AMPL1565   | chr4  | 106197441 | 106197709 |
| 178 | AMPL47323  | chr11 | 119148794 | 119149059 |
| 179 | AMPL200758 | chr11 | 119149187 | 119149457 |
| 180 | AMPL253478 | chr9  | 133738047 | 133738317 |
| 181 | AMPL200757 | chr9  | 133738257 | 133738510 |
| 182 | AMPL200561 | chr9  | 133747442 | 133747711 |
| 183 | AMPL200414 | chr9  | 133748144 | 133748418 |
| 184 | AMPL200415 | chr9  | 133748358 | 133748545 |
| 185 | AMPL200672 | chr9  | 133750218 | 133750480 |
| 186 | AMPL200554 | chr9  | 133753746 | 133754011 |
| 187 | AMPL253505 | chr9  | 133755364 | 133755636 |
| 188 | AMPL90657  | chr7  | 148504633 | 148504900 |
| 189 | AMPL90666  | chr7  | 148506075 | 148506342 |
| 190 | AMPL317126 | chr7  | 148506310 | 148506575 |
| 191 | AMPL253481 | chr7  | 148507328 | 148507604 |
| 192 | AMPL1138   | chr7  | 148508594 | 148508869 |
| 193 | AMPL253507 | chr7  | 148511012 | 148511272 |
| 194 | AMPL90663  | chr7  | 148511912 | 148512187 |
| 195 | AMPL253486 | chr7  | 148512501 | 148512736 |

**Additional file 2: Table S2. Cont.**

|     |            |      |           |           |
|-----|------------|------|-----------|-----------|
| 196 | AMPL253496 | chr7 | 148513689 | 148513958 |
| 197 | AMPL90660  | chr7 | 148514249 | 148514516 |
| 198 | AMPL90668  | chr7 | 148514757 | 148515022 |
| 199 | AMPL90669  | chr7 | 148514962 | 148515234 |
| 200 | AMPL90658  | chr7 | 148516593 | 148516867 |
| 201 | AMPL90670  | chr7 | 148523365 | 148523600 |
| 202 | AMPL90671  | chr7 | 148523540 | 148523803 |
| 203 | AMPL90672  | chr7 | 148524083 | 148524338 |
| 204 | AMPL90673  | chr7 | 148524278 | 148524514 |
| 205 | AMPL90674  | chr7 | 148525756 | 148526022 |
| 206 | AMPL90675  | chr7 | 148526789 | 148527039 |
| 207 | AMPL90667  | chr7 | 148529637 | 148529905 |
| 208 | AMPL90661  | chr7 | 148543458 | 148543731 |
| 209 | AMPL90655  | chr7 | 148544118 | 148544334 |
| 210 | AMPL90656  | chr7 | 148544274 | 148544448 |
| 211 | AMPL417935 | chr5 | 170837379 | 170837627 |
| 212 | AMPL1449   | chr2 | 198266297 | 198266560 |
| 213 | AMPL90214  | chr2 | 198266483 | 198266751 |
| 214 | AMPL1451   | chr2 | 198266691 | 198266880 |
| 215 | AMPL1453   | chr2 | 198267125 | 198267374 |
| 216 | AMPL1454   | chr2 | 198267314 | 198267578 |
| 217 | AMPL90202  | chr2 | 198267560 | 198267821 |
| 218 | AMPL90132  | chr2 | 209113057 | 209113312 |
| 219 | AMPL90133  | chr2 | 209113252 | 209113426 |
