# Supplementary material for: Analysis of genetic variants in myeloproliferative neoplasms using a 22-gene next-generation sequencing panel
Source: PubMed Central journal article supplement (PMC8760696; doi:10.1186/s12920-021-01145-0), 2022-01-15
Supplement: 12920_2021_1145_MOESM3_ESM.pdf [file 12920_2021_1145_MOESM3_ESM.pdf]

**Additional file 3: Table S3.** Details of variants present in reference standards.

| Reference standard                     | Gene          | Variant            | Expected/Target Allelic Frequency, % |
|----------------------------------------|---------------|--------------------|--------------------------------------|
| Horizon Tru-Q 0<br>(Wildtype standard) | <i>EGFR</i>   | G719S              | 16.70                                |
|                                        | <i>BRAF</i>   | V600E              | 8.00                                 |
|                                        | <i>KRAS</i>   | G13D               | 25.00                                |
|                                        | <i>PIK3CA</i> | H1047R             | 30.00                                |
| Horizon Tru-Q 1                        | <i>BRAF</i>   | V600E              | 8.00                                 |
|                                        | <i>BRAF</i>   | V600K              | 4.00                                 |
|                                        | <i>EGFR</i>   | G719S              | 16.70                                |
|                                        | <i>EGFR</i>   | T790M              | 4.20                                 |
|                                        | <i>FLT3</i>   | $\Delta$ I836      | 5.00                                 |
|                                        | <i>IDH1</i>   | R132C              | 5.00                                 |
|                                        | <i>JAK2</i>   | V617F              | 5.00                                 |
|                                        | <i>KRAS</i>   | G12A               | 5.00                                 |
|                                        | <i>KRAS</i>   | G12R               | 5.00                                 |
|                                        | <i>KRAS</i>   | G13D               | 25.00                                |
|                                        | <i>MEK1</i>   | P124L              | 5.00                                 |
|                                        | <i>NOTCH1</i> | L1600P             | 4.80                                 |
|                                        | <i>NRAS</i>   | Q61K               | 5.00                                 |
| <i>PIK3CA</i>                          | H1047R        | 30.00              |                                      |
| Horizon Tru-Q 7                        | <i>ABL1</i>   | T315I              | 1.30                                 |
|                                        | <i>ALK</i>    | F1174L             | 1.30                                 |
|                                        | <i>BRAF</i>   | V600E              | 8.00                                 |
|                                        | <i>BRAF</i>   | V600G              | 1.00                                 |
|                                        | <i>BRAF</i>   | V600K              | 1.00                                 |
|                                        | <i>BRAF</i>   | V600M              | 1.00                                 |
|                                        | <i>BRAF</i>   | V600R              | 1.00                                 |
|                                        | <i>EGFR</i>   | G719S              | 16.70                                |
|                                        | <i>EGFR</i>   | L858R              | 1.00                                 |
|                                        | <i>EGFR</i>   | L861Q              | 1.00                                 |
|                                        | <i>EGFR</i>   | T790M              | 1.00                                 |
|                                        | <i>EGFR</i>   | $\Delta$ E746-A750 | 1.00                                 |
|                                        | <i>FGFR2</i>  | S252W              | 1.00                                 |
|                                        | <i>FLT3</i>   | D835Y              | 1.30                                 |
|                                        | <i>FLT3</i>   | $\Delta$ I836      | 1.30                                 |
|                                        | <i>GNA11</i>  | Q209L              | 1.30                                 |
|                                        | <i>GNAQ</i>   | Q209L              | 1.30                                 |
|                                        | <i>IDH1</i>   | R132C              | 1.30                                 |
|                                        | <i>IDH1</i>   | R132H              | 1.30                                 |
|                                        | <i>IDH2</i>   | R140Q              | 1.30                                 |
|                                        | <i>IDH2</i>   | R172K              | 1.30                                 |
|                                        | <i>JAK2</i>   | V617F              | 1.30                                 |
|                                        | <i>KIT</i>    | D816V              | 1.30                                 |
|                                        | <i>KRAS</i>   | A146T              | 1.30                                 |
|                                        | <i>KRAS</i>   | G12A               | 1.30                                 |
|                                        | <i>KRAS</i>   | G12C               | 1.30                                 |
|                                        | <i>KRAS</i>   | G12D               | 1.30                                 |
|                                        | <i>KRAS</i>   | G12R               | 1.30                                 |
|                                        | <i>KRAS</i>   | G12S               | 1.30                                 |
|                                        | <i>KRAS</i>   | G12V               | 1.30                                 |
| <i>KRAS</i>                            | G13D          | 25.00              |                                      |

Additional file 3: Table S3. Cont.

| Reference standard               | Gene          | Variant                          | Expected/Target Allelic Frequency, % |
|----------------------------------|---------------|----------------------------------|--------------------------------------|
| Horizon Tru-Q 7                  | <i>KRAS</i>   | Q61H                             | 1.30                                 |
|                                  | <i>KRAS</i>   | Q61L                             | 1.30                                 |
|                                  | <i>MEK1</i>   | P124L                            | 1.30                                 |
|                                  | <i>MET</i>    | Y1253D                           | 1.00                                 |
|                                  | <i>NOTCH</i>  | L1601P                           | 1.30                                 |
|                                  | <i>NRAS</i>   | Q61H                             | 1.30                                 |
|                                  | <i>NRAS</i>   | Q61K                             | 1.30                                 |
|                                  | <i>NRAS</i>   | Q61L                             | 1.30                                 |
|                                  | <i>NRAS</i>   | Q61R                             | 1.30                                 |
|                                  | <i>PDGFRA</i> | D842V                            | 1.30                                 |
|                                  | <i>PIK3CA</i> | E542K                            | 1.30                                 |
|                                  | <i>PIK3CA</i> | E545K                            | 1.30                                 |
|                                  | <i>PIK3CA</i> | H1047R                           | 30.00                                |
| SeraSeq Myeloid Mutation DNA Mix | <i>CALR</i>   | L367fs*46                        | 5.00                                 |
|                                  | <i>CSF3R</i>  | T618I                            | 5.00                                 |
|                                  | <i>FLT3</i>   | dup c.1759_1800                  | 5.00                                 |
|                                  | <i>IDH1</i>   | R132C                            | 5.00                                 |
|                                  | <i>JAK2</i>   | V617F                            | 5.00                                 |
|                                  | <i>MPL</i>    | W515L                            | 5.00                                 |
|                                  | <i>NPM1</i>   | W288fs*12                        | 5.00                                 |
|                                  | <i>SF3B1</i>  | K700E                            | 5.00                                 |
|                                  | <i>SF3B1</i>  | K666N                            | 5.00                                 |
|                                  | <i>SRSF2</i>  | P95_R102del                      | 5.00                                 |
|                                  | <i>ABL1</i>   | T315I                            | 10.00                                |
|                                  | <i>ASXL1</i>  | E635fs*15                        | 10.00                                |
|                                  | <i>ASXL1</i>  | G646fs*12                        | 10.00                                |
|                                  | <i>BRAF</i>   | V600E                            | 10.00                                |
|                                  | <i>CBL</i>    | L380P                            | 10.00                                |
|                                  | <i>CBL</i>    | R420Q                            | 10.00                                |
|                                  | <i>FLT3</i>   | dup chr 13:28,608,250-28,608,277 | 10.00                                |
|                                  | <i>FLT3</i>   | D835Y                            | 10.00                                |
|                                  | <i>JAK2</i>   | N542_E543del                     | 10.00                                |
|                                  | <i>MYD88</i>  | L265P                            | 10.00                                |
|                                  | <i>U2AF1</i>  | S34F                             | 10.00                                |
|                                  | <i>CEBPA</i>  | H24fs*84                         | 15.00                                |
|                                  | <i>CEBPA</i>  | K313_V314insK                    | 15.00                                |
