# Supplementary material for: Analysis of genetic variants in myeloproliferative neoplasms using a 22-gene next-generation sequencing panel
Source: PubMed Central journal article supplement (PMC8760696; doi:10.1186/s12920-021-01145-0), 2022-01-15
Supplement: 12920_2021_1145_MOESM4_ESM.pdf [file 12920_2021_1145_MOESM4_ESM.pdf]

**Additional file 4: Table S4.** Primers used in variant confirmation.

| <b>Target</b>                                                   | <b>RefSeq</b> | <b>Primer sequence (5' to 3')</b>                       | <b>Product size (bp)</b> |
|-----------------------------------------------------------------|---------------|---------------------------------------------------------|--------------------------|
| <i>ABL1</i> exon 6<br>p.N331S                                   | NM_005157     | F: CTGAGGAGCAGAGTCAGAATCC<br>R: CACTGAGGTTAGAAGCTGCG    | 397                      |
| <i>ASXL1</i> exon 12<br>p.Y591fs*0                              | NM_015338     | F: GTGGCATATAACAGCCCTTGAG<br>R: ACCTCCCTCATCGGTGGC      | 462                      |
| <i>ASXL1</i> exon 12<br>p.G646Wfs*10                            | NM_015338     | F: TTACCAGATATGCCCCGGA<br>R: AGCTCTGGACATGGCAGTTC       | 389                      |
| <i>ASXL1</i> exon 12<br>p.L731Yfs*12                            | NM_015338     | F: GAGCACCCCTGGAAAGTGTA<br>R: TGGTGCCAGACTCACATTCA      | 350                      |
| <i>ASXL1</i> exon 12<br>p.Q1433Q                                | NM_015338     | F: GGGCATAGTCCCCTGGAACT<br>R: GGCTCGCACCAAAGTTTGCT      | 286                      |
| <i>CALR</i> exon 9<br>p.K385T;<br>p.K385Ifs*46/<br>p.L367Tfs*45 | NM_004343     | F: GAGTTTGGCAACGAGACGTG<br>R: CCCAAATCCGAACCAGCCT       | 440/394                  |
| <i>DNMT3A</i> exon 10<br>p.P385P                                | NM_175629     | F: ATAAAGGACAGAAGATTCGGC<br>R: TTCTCTTCTGGGTGCTGATA     | 229                      |
| <i>JAK2</i> exon 14<br>p.V617F                                  | NM_004972     | F: CTTTCTTTGAAGCAGCAAGT<br>R: AGTTTACTGACACCTAGC        | 189                      |
| <i>RUNX1</i> exon 6<br>p.Q308H                                  | NM_001001890  | F: TAGGCGGTATCATCCTGGGTAGC<br>R: TCAGTAGGGCCTCCACACGGC  | 577                      |
| <i>SF3B1</i> exon 15<br>p.K700E                                 | NM_012433     | F: TTCTGCAGTTTGGCTGAATAGT<br>R: ATAGCCTTCAAGAAAGCAGCC   | 372                      |
| <i>TET2</i> exon 3<br>p.A304V                                   | NM_001127208  | F: CATTGCGGTGCAGAAAACCA<br>R: AGTGAACACTGAGCTTTGCT      | 448                      |
| <i>TET2</i> exon 3<br>p.F868L                                   | NM_001127208  | F: TGTCCAAATGGGACTGGAGG<br>R: GATGCCACCTTAGAGCAGCA      | 464                      |
| <i>TET2</i> exon 5<br>p.I1195V                                  | NM_001127208  | F: GGCATGAGTCTTTGATCTGGG<br>R: CCGTTCATTTCTCAGGATGTGG   | 315                      |
| <i>TET2</i> exon 6<br>p.Y1245C                                  | NM_001127208  | F: TGCCCTAATTGTGATCTAAACATGA<br>R: ATGTAAAAGTGCACGCTGAA | 431                      |
| <i>TET2</i> exon 7<br>p.D1314Mfs*48                             | NM_001127208  | F: ACAGAGTTAGATTAGACTTCTTTT<br>R: ACAGTTTGGGAAAACTTTGAT | 390                      |
| <i>TET2</i> exon 11<br>p.E1513G                                 | NM_001127208  | F: TCAGAACCTGACTTTGCTCTT<br>R: GGGCTGGTGCTTCCATAGAT     | 398                      |
| <i>U2AF1</i> exon 6<br>p.Q157P                                  | NM_006758     | F: ATTCCACCTTACTATACCTGAGTGT<br>R: CATGAAGTTGCAGAAGCCGC | 373                      |
