# Supplementary material for: Analysis of genetic variants in myeloproliferative neoplasms using a 22-gene next-generation sequencing panel
Source: PubMed Central journal article supplement (PMC8760696; doi:10.1186/s12920-021-01145-0), 2022-01-15
Supplement: 12920_2021_1145_MOESM6_ESM.pdf [file 12920_2021_1145_MOESM6_ESM.pdf]

**Additional file 6: Table S5.** Sequencing metrics of NGS runs for the technical validation of the custom NGS panel.

| <b>Metric</b>                | <b>Forward read</b> |              | <b>Reverse read</b> |              |
|------------------------------|---------------------|--------------|---------------------|--------------|
|                              | <b>Run 1</b>        | <b>Run 2</b> | <b>Run 1</b>        | <b>Run 2</b> |
| Cluster Density (K/mm2)      | 860 ± 28            | 878 ± 17     | 860 ± 28            | 878 ± 17     |
| Clusters PF (%) <sup>1</sup> | 94.76 ± 0.53        | 93.09 ± 1.44 | 94.76 ± 0.53        | 93.09 ± 1.44 |
| % ≥ Q30 <sup>2</sup>         | 97.80               | 97.35        | 96.12               | 95.27        |

<sup>1</sup> The percentage of clusters passing filter (%PF) is an indication of signal purity from each cluster. <sup>2</sup> Q30 indicates an accuracy of 99.9%. The percentage of bases >Q30 is averaged across the entire run. The Miseq System specifications are 865-965 K/mm2 cluster density and >80% of bases above Q30. K, kilobases; PF, passing filter.
