# Supplementary material for: Analysis of genetic variants in myeloproliferative neoplasms using a 22-gene next-generation sequencing panel
Source: PubMed Central journal article supplement (PMC8760696; doi:10.1186/s12920-021-01145-0), 2022-01-15
Supplement: 12920_2021_1145_MOESM7_ESM.pdf [file 12920_2021_1145_MOESM7_ESM.pdf]

**Additional file 7: Table S6.** Amplicon coverage data for the technical validation of the custom NGS panel.

| <b>Sample</b> | <b>Amplicon mean coverage depth</b> |              | <b>Uniformity of coverage<sup>3</sup></b> |              |
|---------------|-------------------------------------|--------------|-------------------------------------------|--------------|
|               | <b>Run 1</b>                        | <b>Run 2</b> | <b>Run 1</b>                              | <b>Run 2</b> |
| Tru-Q0        | 6261                                | 4643         | 98.17                                     | 98.63        |
| Tru-Q1        | 4589                                | 6455         | 98.17                                     | 98.17        |
| Tru-Q7-rep1   | 6887                                | 6304         | 98.63                                     | 98.63        |
| Tru-Q7-rep2   | 4646                                | 6717         | 98.17                                     | 98.17        |
| Seraseq-rep1  | 7944                                | 6256         | 98.17                                     | 98.17        |
| Seraseq-rep2  | 6543                                | 6321         | 98.17                                     | 98.63        |

<sup>3</sup> The uniformity of coverage is measured as the percentage of targeted base positions in which the read depth is 20% greater than that of the mean region target coverage depth.
