# Supplementary material for: Analysis of genetic variants in myeloproliferative neoplasms using a 22-gene next-generation sequencing panel
Source: PubMed Central journal article supplement (PMC8760696; doi:10.1186/s12920-021-01145-0), 2022-01-15
Supplement: 12920_2021_1145_MOESM8_ESM.pdf [file 12920_2021_1145_MOESM8_ESM.pdf]

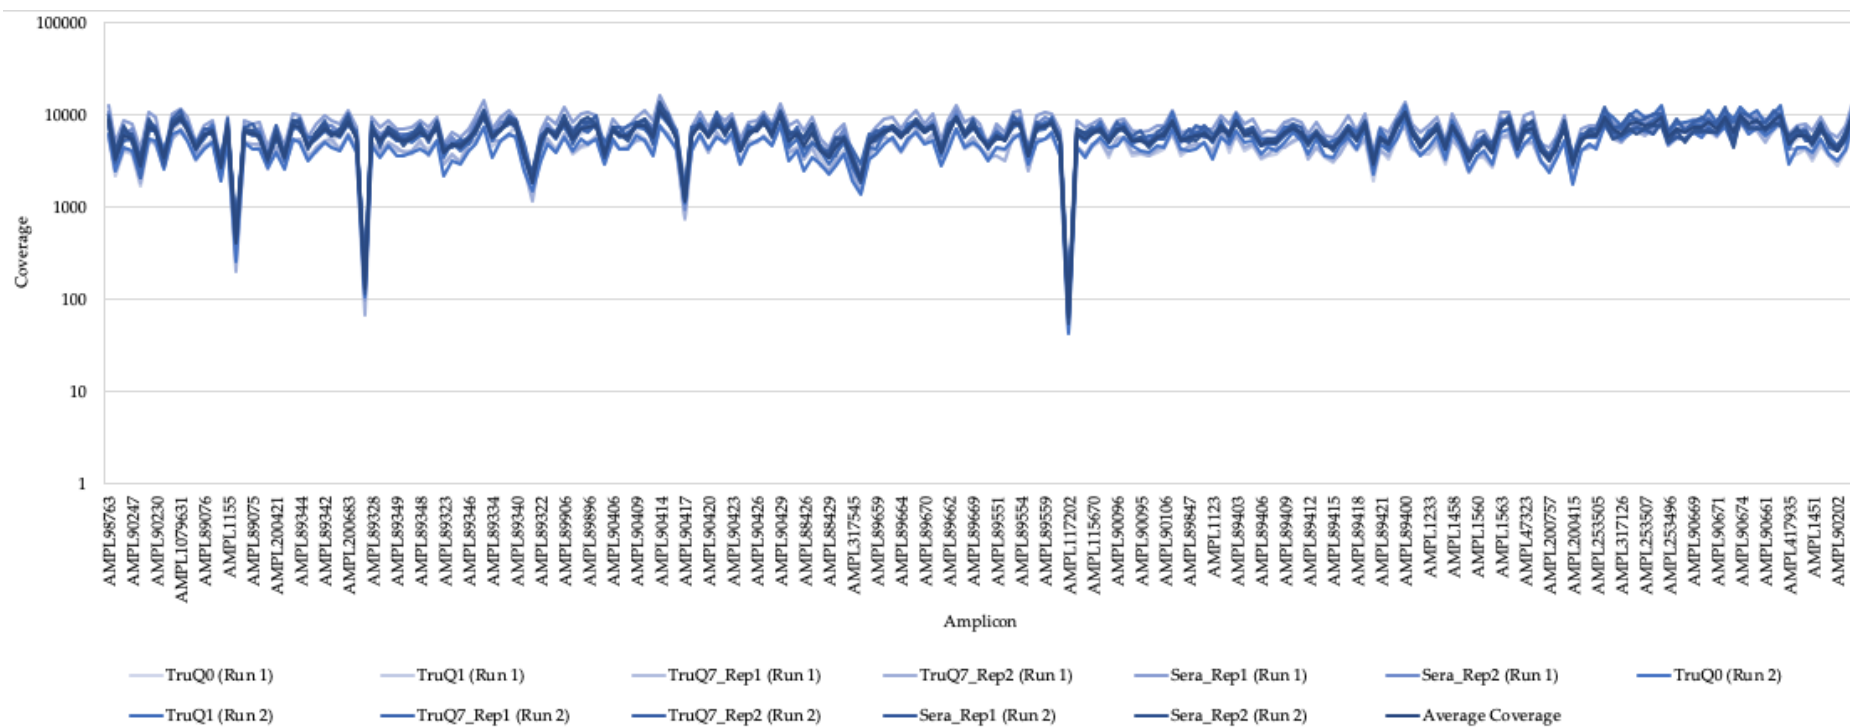

**Additional file 8: Fig. S2.** Amplicon coverage across reference standards in the technical validation of the custom NGS panel. More details on the amplicon regions can be found in Additional file 2: Table S2 and Additional File 10.
