# Supplementary material for: Analysis of genetic variants in myeloproliferative neoplasms using a 22-gene next-generation sequencing panel
Source: PubMed Central journal article supplement (PMC8760696; doi:10.1186/s12920-021-01145-0), 2022-01-15
Supplement: 12920_2021_1145_MOESM9_ESM.pdf [file 12920_2021_1145_MOESM9_ESM.pdf]

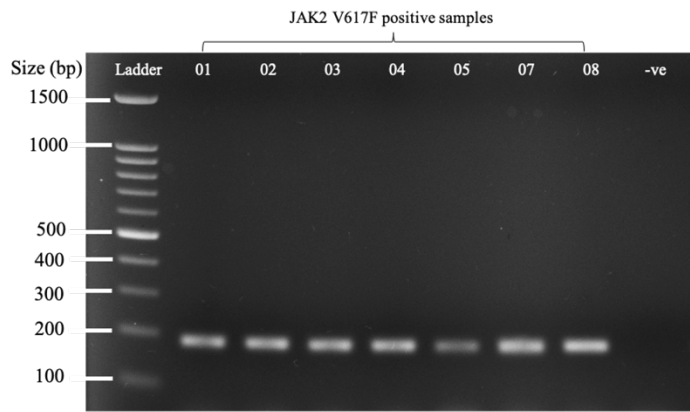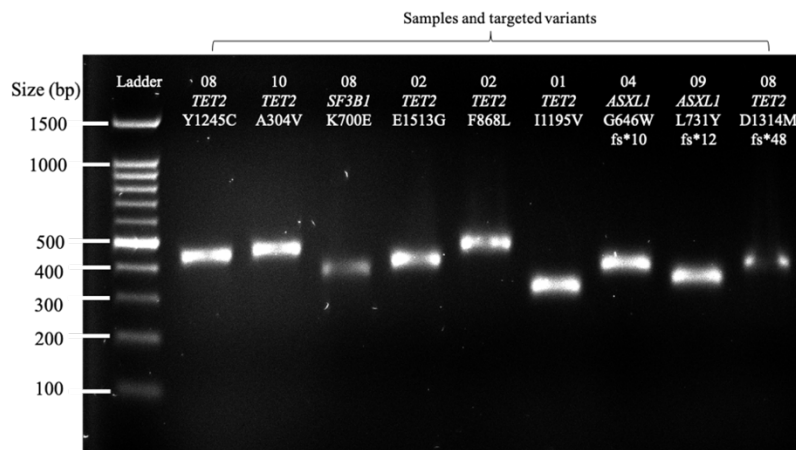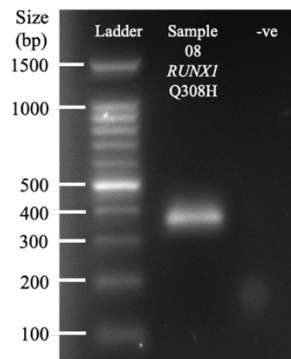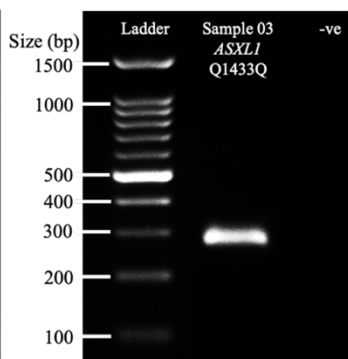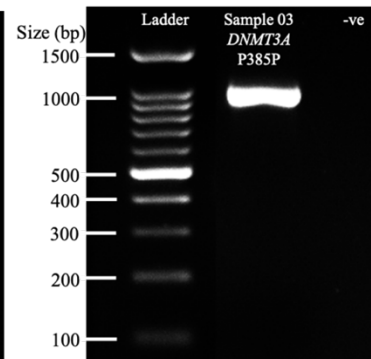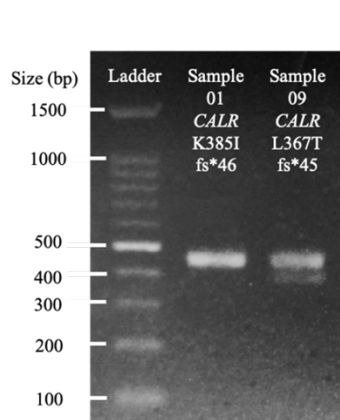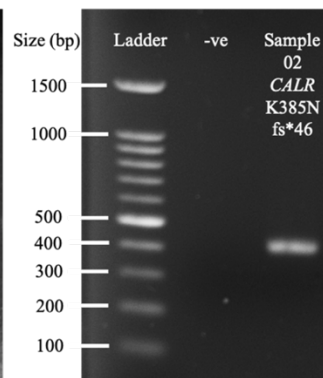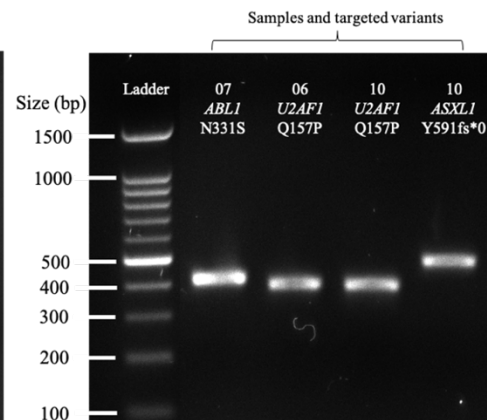

Additional file 9: Fig. S3. Gel electrophoresis images. -ve, Negative control.
