# Supplementary material for: Analysis of genetic variants in myeloproliferative neoplasms using a 22-gene next-generation sequencing panel
Source: PubMed Central journal article supplement (PMC8760696; doi:10.1186/s12920-021-01145-0), 2022-01-15
Supplement: 12920_2021_1145_MOESM11_ESM.pdf [file 12920_2021_1145_MOESM11_ESM.pdf]

```
>NC_000001.10:43814902-43815103 Homo sapiens chromosome 1,  
GRCh37.p13 Primary Assembly  
TGGGCCGAAGTCTGACCCCTTTTGTCTCCTAGCCTGGATCTCCTTGGTGACCGCTCTGCAT  
CTAGTGCTGGGCCTCAGCGCCGTCCTGGGCCTGCTGCTGCTGAGGTGGCAGTTTCCTGCAC  
ACTACAGGTACCGCCCCCGCCAGGCAGGAGACTGGCGGTGGACCAGGTGGAGCCGAAGGCC  
TGTAACAGGCATTCTTGG
```

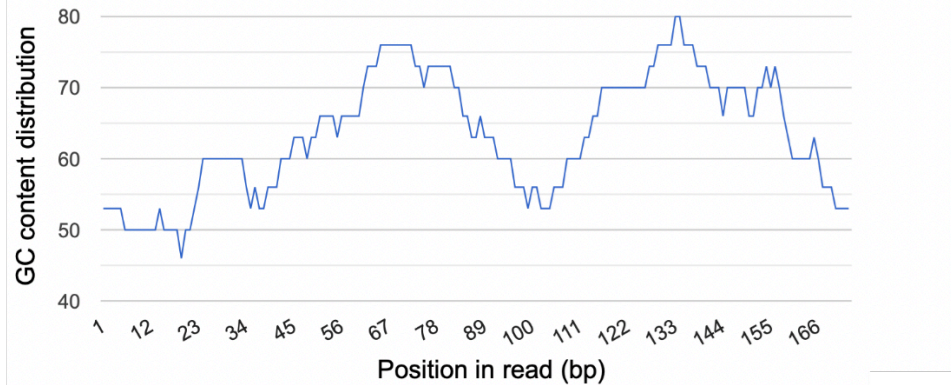

**Additional file 11: Fig. S4.** Distribution of GC content across AMPL117202 (*MPL* exon 10, chr1:43814902-43815103). Graph generated using the GC Content Calculator by Guerra et al., 2016.

#### Reference

Guerra ÁP, Calvo EP, Wasserman M, Chaparro-Olaya J. Producción de proteínas recombinantes de *Plasmodium falciparum* en *Escherichia coli*. *Biomédica*. 2016;36(Sup1):97-108.
